CORRECTION

# Correction: Multilevel analyses of on-demand medication data, with an application to the treatment of Female Sexual Interest/Arousal Disorder

The PLOS ONE Staff

In the Model for analyzing individual events subsection of the Methods, there are errors in third and fourth equation of Model (2). Please view the complete, correct equations here:

$$\beta_{1i} = \gamma_{10} + \gamma_{11}Z_i + u_{1i}$$

$$\text{Single equation : } Y_{ei} = \gamma_{00} + \gamma_{10}X_{ei} + \gamma_{01}Z_i + \gamma_{11}Z_iX_{ei} + u_{1i}X_{ei} + u_{0i} + \epsilon_{ei}$$

The publisher apologizes for the error.

## Reference

1. Kessels R, Bloemers J, Tuiten A, van der Heijden PGM (2019) Multilevel analyses of on-demand medication data, with an application to the treatment of Female Sexual Interest/Arousal Disorder. PLoS ONE 14(8): e0221063. <https://doi.org/10.1371/journal.pone.0221063> PMID: 31415608

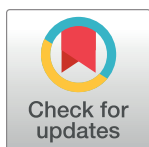

## OPEN ACCESS

**Citation:** The PLOS ONE Staff (2019) Correction: Multilevel analyses of on-demand medication data, with an application to the treatment of Female Sexual Interest/Arousal Disorder. PLoS ONE 14(10): e0224708. <https://doi.org/10.1371/journal.pone.0224708>

**Published:** October 28, 2019

**Copyright:** © 2019 The PLOS ONE Staff. This is an open access article distributed under the terms of the [Creative Commons Attribution License](https://creativecommons.org/licenses/by/4.0/), which permits unrestricted use, distribution, and reproduction in any medium, provided the original author and source are credited.
